# Supplementary material
Source: PubMed Central journal article supplement (PMC2701340)
Supplement: ddp208_1.pdf [file ddp208_1.pdf]

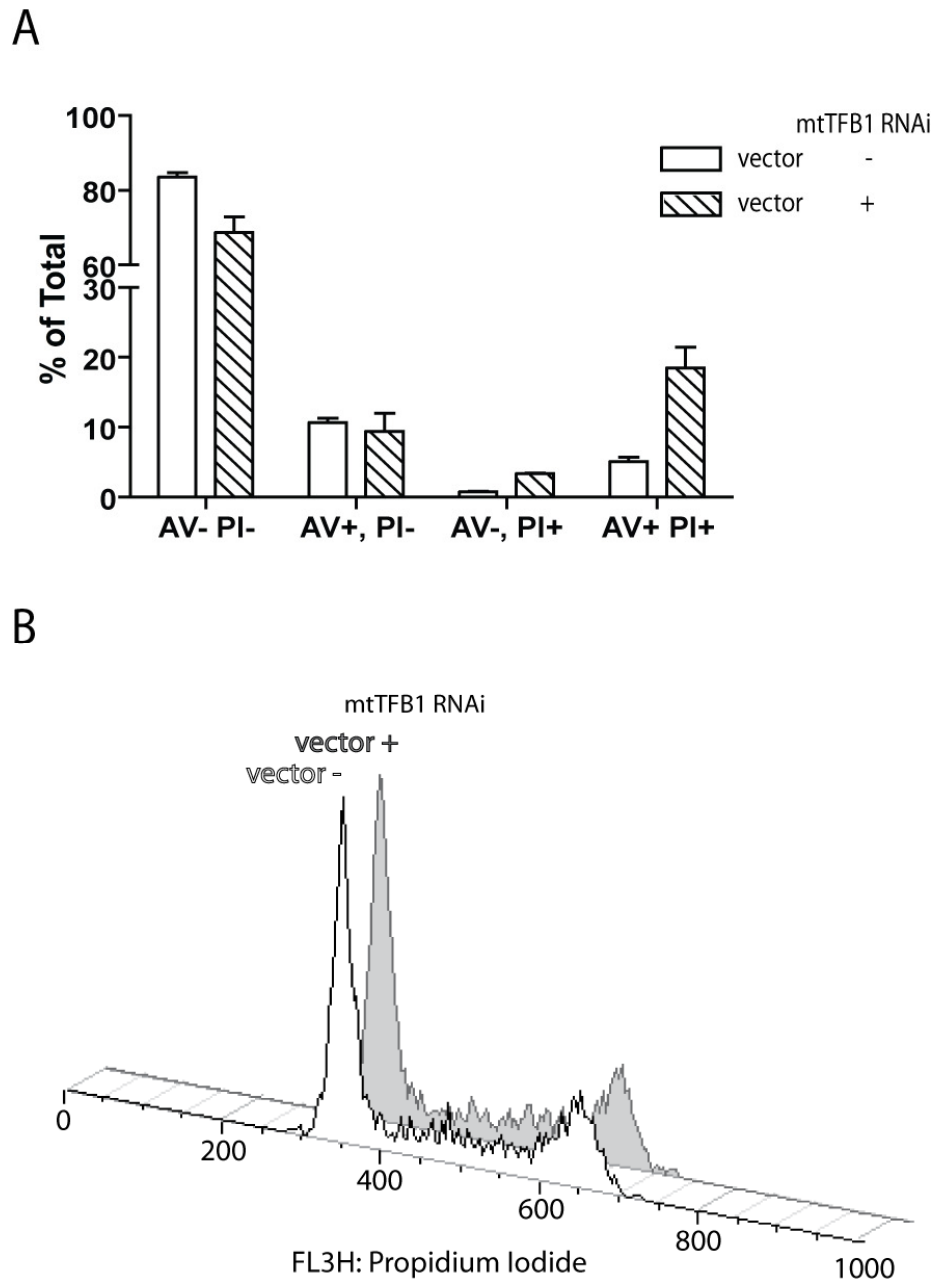

**Figure S1. Decreased growth rates caused by knock-down of h-mtTFB1 by shRNA is not caused by elevated apoptosis or changes in specific stages of the cell cycle.** (A) Apoptosis was measured in cell lines with (+) and without (-) shRNA against h-mtTFB1 and apoptosis was assessed by FACS analysis of Annexin V-FITC/Propidium Iodide staining. There was an increased level of double-positive cells in the shRNA-treated lines, but this small percentage increase does not account for the dramatic growth defect observed (Figure 3B). (B) Cell cycle profiles from control empty-vector-containing HeLa cells with (+) or without (-) h-mtTFB1 shRNA. Despite major growth defect in h-mtTFB1 knock-down cells, the percentage of cell in each stage of the cell cycle was undisturbed.
